# Supplementary material for: Immunoaffinity Cleanup and Isotope Dilution-Based Liquid Chromatography Tandem Mass Spectrometry for the Determination of Six Major Mycotoxins in Feed and Feedstuff
Source: MDPI journal article supplement (doi:10.3390/toxins14090631), 2022-09-11
Supplement: s1 [file s1]

## Article

# Immunoaffinity Cleanup and Isotope Dilution-Based Liquid Chromatography Tandem Mass Spectrometry for the Determination of Six Major Mycotoxins in Feed and Feedstuff

Ying Liu, Yongpeng Jin, Qi Guo, Xiong Wang, Sunlin Luo, Wenjun Yang, Juntao Li and Yiqiang Chen

**Table S1.** Recoveries of other mycotoxins on the IAC.

| Mycotoxins               | Recovery (%) |
|--------------------------|--------------|
| 3-Acetyl deoxynivalenol  | 97.8         |
| Aflatoxin B <sub>2</sub> | 96.8         |
| Aflatoxin G <sub>1</sub> | 95.6         |
| Aflatoxin G <sub>2</sub> | 96.3         |
| Aflatoxin M <sub>1</sub> | 98.6         |
| Aflatoxin M <sub>2</sub> | 95.2         |
| $\alpha$ -Zearalanol     | 99.5         |
| $\beta$ -Zearalanol      | 95.9         |
| Zearalanone              | 96.2         |
| $\alpha$ -Zearalenol     | 97.4         |
| $\beta$ -Zearalenol      | 95.4         |
| Ochratoxin B             | 96.2         |
| Ochratoxin C             | 97.4         |
| HT-2 toxin               | 95.9         |
| Fumonisin B <sub>2</sub> | 94.3         |
| Fumonisin B <sub>3</sub> | 93.6         |
| Citrinin                 | 0            |
| Patulin                  | 0            |
| Diacetoxyscirpenol       | 0            |

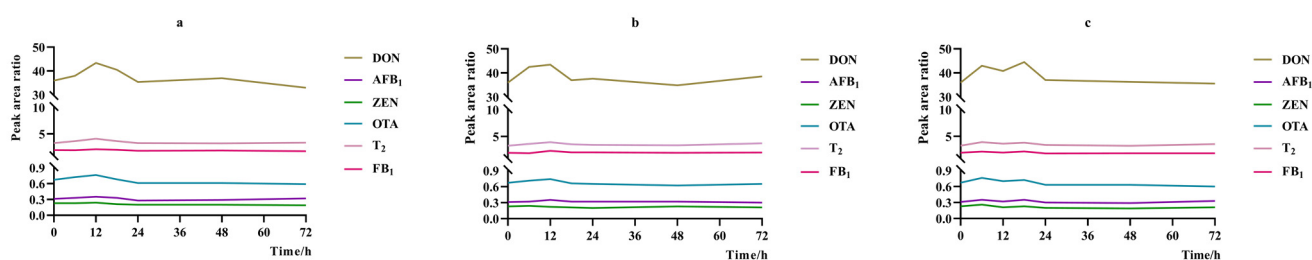

**Figure S1.** Changes in peak area ratios of six major mycotoxins and their isotope internal standards in standard solutions with time at different temperatures (a. 4 °C, RSDs all below 9.9% within 72 h; b. 25 °C, RSDs all below 8.4% within 72 h; c. 37 °C, RSDs all below 9.9% within 72 h).

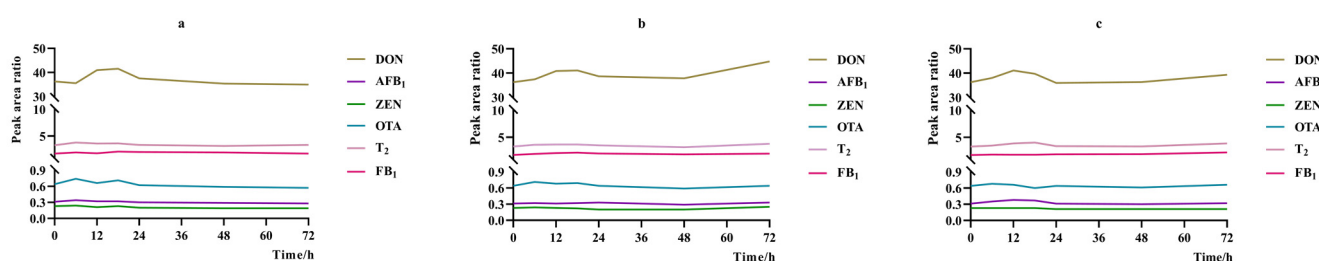

**Figure S2.** Changes in peak area ratios of six major mycotoxins and their isotope internal standards in corn with time at different temperatures (a. 4 °C, RSDs all below 9.5% within 72 h; b. 25 °C, RSDs all below 7.7% within 72 h; c. 37 °C, RSDs all below 9.6% within 72 h).

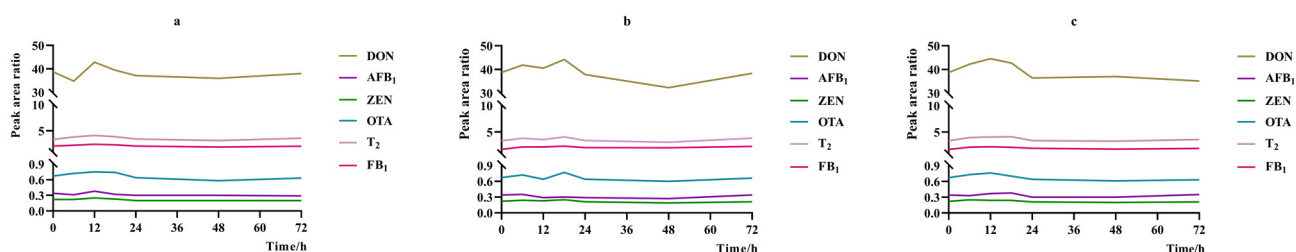

**Figure S3.** Changes in peak area ratios of six major mycotoxins and their isotope internal standards in wheat with time at different temperatures (a. 4 °C, RSDs all below 9.8% within 72 h; b. 25 °C, RSDs all below 9.8% within 72 h; c. 37 °C, RSDs all below 9.9% within 72 h).

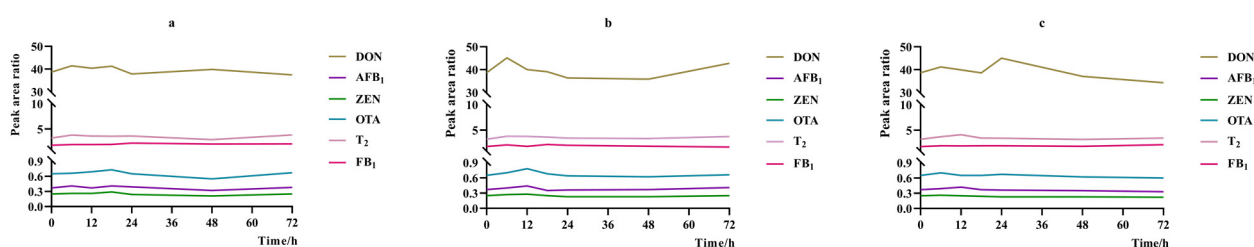

**Figure S4.** Changes in peak area ratios of six major mycotoxins and their isotope internal standards in chicken compound feed with time at different temperatures (a. 4 °C, RSDs all below 9.8% within 72 h; b. 25 °C, RSDs all below 9.9% within 72 h; c. 37 °C, RSDs all below 9.2% within 72 h).
